# Supplementary material for: Heavy Metal and Metalloid Contamination in Agricultural Matrices of Gopalganj, Bangladesh: A Comprehensive Analysis and Health Risk Assessment
Source: Research Square preprint supplement (doi:10.21203/rs.3.rs-6703800/v1), 2025-06-03
Supplement: Supplementary file 1 [file 9e6414a735c70cc2da8949ca.docx]

**Table 2:** **Concentrations of trace metals (mg/kg) in soil, water and five indigenous vegetables collected from the three-agriculture area at Gopalganj in Bangladesh and corresponding comparable Maximum Permissible Value (MPV) by WHO/FAO for Bangladesh.**

| **Places** | **Cd** | | | | |
| --- | --- | --- | --- | --- | --- |
|  | **Vegetable** | | **Soil** | **Water** | |
| MPV | 0.1 (mg/kg) | | 3(mg/kg) | 0.003(mg/kg) | |
| ROGUNATHPUR | Chili | -0.0032 | -0.0090 | -0.0034 |
| Brinjal | -0.0044 | -0.0082 |
| Pointed-gourd | -0.0080 | -0.0099 |
| Ladies Finger | -0.0036 | -0.0083 |
| Papaya | -0.0013 | -0.0103, |
| NOBINBAG | Chili | -0.0052 | -0.0079 | -0.0034 |
| Brinjal | -0.0069 | -0.0090 |
| Pointed-gourd | -0.0064 | -0.0098 |
| Ladies Finger | -0.0008 | -0.0088 |
| Papaya | -0.0052 | -0.0093 |
| GOBRA | Chili | -0.0050 | -0.0083 | -0.0034 |
| Brinjal | -0.0031 | -0.0096 |
| Pointed-gourd | -0.0083 | -0.0106 |
| Ladies Finger | -0.0013 | -0.0095 |
| Papaya | -0.0014 | -0.0101 |

| **Places** | **Cr** | | | | |
| --- | --- | --- | --- | --- | --- |
|  | **Vegetable** | | **Soil** | **Water** | |
| MPV | 0.5 (mg/kg) | | 200(mg/kg) | 0.05(mg/kg) | |
| ROGUNATHPUR | Chili | 0.0031 | 0.4862 | -0.0440 |
| Brinjal | 0.0332 | 0.5766 |
| Pointed-gourd | -0.00327 | 0.5522 |
| Ladies Finger | 0.0356 | 0.5832 |
| Papaya | 0.0031 | 0.6068 |
| NOBINBAG | Chili | 0.0097 | 0.4580 | -0.0440 |
| Brinjal | 0.0139 | 0.5211 |
| Pointed-gourd | -0.0280 | 0.4570 |
| Ladies Finger | -0.0035 | 0.4702 |
| Papaya | 0.0040 | 0.5567 |
| GOBRA | Chili | -0.0064 | 0.4495 | -0.0440 |
| Brinjal | -0.0071 | 0.5927 |
| Pointed-gourd | 0.0671 | 0.6030 |
| Ladies Finger | -0.0399 | 0.5879 |
| Papaya | 0.0025 | 0.6023 |

| **Places** | **Zn** | | | | |
| --- | --- | --- | --- | --- | --- |
|  | **Vegetable** | | **Soil** | **Water** | |
|  | 50 (mg/kg) | | 300(mg/kg) | 05(mg/kg) | |
| ROGUNATHPUR | Chili | 0.4788 | 0.1171 | 0.0218 |
| Brinjal | 0.4522 | 0.1530 |
| Pointed-gourd | 0.4845 | 0.2257 |
| Ladies Finger | 0.5239 | 0.1889 |
| Papaya | 0.3974 | 0.1945 |
| NOBINBAG | Chili | 0.3947 | 0.1108 | 0.0218 |
| Brinjal | 0.4730 | 0.2089 |
| Pointed-gourd | 0.5630 | 0.1054 |
| Ladies Finger | 0.1137 | 0.1074 |
| Papaya | 0.4022 | 0.1876 |
| GOBRA | Chili | 0.4522 | 0.1089 | 0.0218 |
| Brinjal | 0.5992 | 0.2257 |
| Pointed-gourd | 0.4508 | 0.2063 |
| Ladies Finger | 0.1241 | 0.2164 |
| Papaya | 0.3212 | 0.2130 |

| **Places** | **Ni** | | | | |
| --- | --- | --- | --- | --- | --- |
|  | **Vegetable** | | **Soil** | **Water** | |
|  | 1.5 (mg/kg) | | 60(mg/kg) | 0.02(mg/kg) | |
| ROGUNATHPUR | Chili | 0.0317 | 0.3798 | 0.0087 |
| Brinjal | 0.0548 | 0.4626 |
| Pointed-gourd | 0.0169 | 0.4064 |
| Ladies Finger | 0.0069 | 0.4685 |
| Papaya | 0.0169 | 0.5004 |
| NOBINBAG | Chili | 0.0282 | 0.3922 | 0.0087 |
| Brinjal | 0.0099 | 0.5288 |
| Pointed-gourd | 0.0317 | 0.3337 |
| Ladies Finger | 0.0288 | 0.3438 |
| Papaya | 0.0117 | 0.4988 |
| GOBRA | Chili | 0.0299 | 0.3390 | 0.0087 |
| Brinjal | 0.0128 | 0.4661 |
| Pointed-gourd | 0.0240 | 0.4951 |
| Ladies Finger | 0.0039 | 0.4673 |
| Papaya | 0.0201 | 0.5231 |

| **Places** | **Pb** | | | | |
| --- | --- | --- | --- | --- | --- |
|  | **Vegetable** | | **Soil** | **Water** | |
|  | 0.2 (mg/kg) | | 50(mg/kg) | 0.01(mg/kg) | |
| ROGUNATHPUR | Chili | -0.1000 | 0.2440 | -0.0754 |
| Brinjal | -0.0853 | 0.3816 |
| Pointed-gourd | -0.1541 | 0.2980 |
| Ladies Finger | -0.1246 | 0.4012 |
| Papaya | -0.0705 | 0.3914 |
| NOBINBAG | Chili | -0.0902 | 0.2194 | -0.0754 |
| Brinjal | -0.0951 | 0.3275 |
| Pointed-gourd | -0.1442 | 0.2194 |
| Ladies Finger | -0.1344 | 0.2096 |
| Papaya | -0.0772 | 0.4112 |
| GOBRA | Chili | -0.1147 | 0.1801 | -0.0754 |
| Brinjal | -0.1344 | 0.3521 |
| Pointed-gourd | -0.0165 | 0.3963 |
| Ladies Finger | -0.0803 | 0.3472 |
| Papaya | -0.0662 | 0.3701 |

| **Places** | **Cu** | | | | |
| --- | --- | --- | --- | --- | --- |
|  | **Vegetable** | | **Soil** | **Water** | |
|  | 40 (mg/kg) | | 150(mg/kg) | 01(mg/kg) | |
| ROGUNATHPUR | Chili | 0.1924 | 0.3775 | 0.0158 |
| Brinjal | 0.3046 | 0.6572 |
| Pointed-gourd | 0.0892 | 0.4721 |
| Ladies Finger | 0.0797 | 0.6716 |
| Papaya | 0.0621 | 0.6897 |
| NOBINBAG | Chili | 0.1711 | 0.3371 | 0.0158 |
| Brinjal | 0.2350 | 0.5657 |
| Pointed-gourd | 0.1302 | 0.3296 |
| Ladies Finger | 0.2605 | 0.3270 |
| Papaya | 0.0611 | 0.6792 |
| GOBRA | Chili | 0.1669 | 0.3195 | 0.0158 |
| Brinjal | 0.2605 | 0.6492 |
| Pointed-gourd | 0.1621 | 0.6891 |
| Ladies Finger | 0.1164 | 0.6710 |
| Papaya | 0.5821 | 0.6832 |
